# Supplementary material for: The expanding field of non-canonical RNA capping: new enzymes and mechanisms
Source: PubMed Central journal article supplement (PMC8131947; doi:10.1098/rsos.201979), 2021-05-19
Supplement: rsos201979_review_history.pdf [file rsos201979_review_history.pdf]

## The expanding field of non-canonical RNA capping: new enzymes and mechanisms

Jana Wiedermannová, Christina Julius and Yulia Yuzenkova

### Article citation details

*R. Soc. open sci.* **8**: 201979.

<http://dx.doi.org/10.1098/rsos.201979>

### Review timeline

Original submission: 1 November 2020

Revised submission: 20 April 2021

Final acceptance: 28 April 2021

Note: Reports are unedited and appear as submitted by the referee. The review history appears in chronological order.

## Review History

### RSOS-201979.R0 (Original submission)

#### Review form: Reviewer 1 (Ben Luisi)

**Is the manuscript scientifically sound in its present form?**

Yes

**Are the interpretations and conclusions justified by the results?**

Yes

**Is the language acceptable?**

Yes

**Do you have any ethical concerns with this paper?**

No

**Have you any concerns about statistical analyses in this paper?**

No

### Recommendation?

Accept with minor revision (please list in comments)

### Comments to the Author(s)

This review summarises current state of knowledge on the variety of non-canonical RNA caps discovered to date, the enzymes involved and their mechanisms, both in eukaryotes and in prokaryotes. The authors explain the mechanism of canonical RNA capping and then propose different non-canonical (NC) capping mechanisms. They address NC capping at the initiation of transcription and post-transcription and propose different enzymes that might be involved in these processes. Apart from the widely described NAD<sup>+</sup>/NADH, they also show some of the molecules recently identified as NC including dinucleotide polyphosphates, ADP ribose, and others. Finally, the authors state some of the questions regarding the mechanisms of NC capping and the physiological function of these alternative RNA caps that remain unanswered.

#### Main comments:

The article can be difficult to read for those who are not familiar with the enzymes and metabolites. Many enzymes are involved: a table can be useful to summarise which enzyme is supposed to be required for a particular non-canonical cap and what is the hypothetical mechanism of the non-canonical capping. There are many abbreviations used, and it might be helpful to also summarise these in the table.

Figures 1 and 3-8 are useful to understand the reactions but could be expanded beyond the simple text presented. Having more graphical figures, with 2D structures of the different interacting molecules and schemas for the protein involved, similar to the ones in Figure 2, might help the reader follow the different mechanisms explained in the Review.

Some positive sense ssRNA viruses have viral protein genome-linked (VPgs) covalently attached to the 5' end of their genome. In caliciviruses, VPgs were confirmed to interact with the cap-binding protein, eIF4E, and to be essential for translation (Goodfellow et al., 2005). Although they are not small molecules but proteins, it might be interesting to mention these viral alternatives as NC 5' RNA caps.

In the second paragraph of page 4 (or page 5 of 17 according to the enumeration at the top of each page). They mention that no NAD-capped RNAs were found in chloroplasts according to Wang et al. (2019), but Zhang et al. (2019) describe a NAD-capped chloroplast rRNA.

Then, they mention an experiment they performed with cyanobacterial RNAPs which could efficiently incorporate NAD<sup>+</sup> into RNA (same page lines 16-20). It would be helpful if they explained a bit more their new findings (what proteins they used? what conditions? etc.) as they do with their experiments with NMNATs NadD and NadR in pages 5-6 (pages 6 of 17 and 7 of 17). (Wang et al., 2019) suggest the absence of NAD-capped RNA in chloroplasts could be due to low levels of free NAD<sup>+</sup> in this organelle. When they assessed if cyanobacterial RNAPs could incorporate NAD<sup>+</sup> to RNA, did they reproduce in vivo conditions?

#### Typographical errors:

Abstract line 21 "However, the discovery ... suggests the existence"

P 2 line 10 "synthesize m7G-RNA"

P4 line 36 "is a cofactor"

P6 line 29 "with the hypothesis"

P6 line 59 "in the active "

P7 line 19 "by an unknown"

P 7 line 41 "may be"

P7 line 52 "monomers or "

P 8 line 11 "the existence"

P8 line 24 "countered by a"

P8 line 17 10<sup>-3</sup> is all superscript

P 10 line 18 "prokaryotes"

P 11 line 14 “thanks to the number”

P 11 line 40 “but the biological”

P 11 line 56 “by an unknown”

P 12 line 12 “by a variable”

P 12 line 31 “there exists dedicated”

#### References

Goodfellow, I. et al. (2005) ‘Calicivirus translation initiation requires an interaction between VPg and eIF4E’, *EMBO Reports*. European Molecular Biology Organization, 6(10), pp. 968–972. doi: 10.1038/sj.embor.7400510.

Wang, Y. et al. (2019) ‘NAD<sup>+</sup>-capped RNAs are widespread in the Arabidopsis transcriptome and can probably be translated’, *Proceedings of the National Academy of Sciences of the United States of America*. National Academy of Sciences, 116(24), pp. 12094–12102. doi: 10.1073/pnas.1903682116.

Zhang, H. et al. (2019) ‘NAD tagSeq reveals that NAD<sup>+</sup>-capped RNAs are mostly produced from a large number of protein-coding genes in Arabidopsis’, *Proceedings of the National Academy of Sciences of the United States of America*. National Academy of Sciences, 116(24), pp. 12072–12077. doi: 10.1073/pnas.1903683116.

## Review form: Reviewer 2

**Is the manuscript scientifically sound in its present form?**

Yes

**Are the interpretations and conclusions justified by the results?**

Yes

**Is the language acceptable?**

Yes

**Do you have any ethical concerns with this paper?**

No

**Have you any concerns about statistical analyses in this paper?**

No

**Recommendation?**

Accept with minor revision (please list in comments)

**Comments to the Author(s)**

RNA can be subjected to diverse non-canonical 5' modifications – called capping. This review presents a comprehensive insight into the different types of non-canonical RNA modifications that exist. Non-canonical RNA capping can have reaching implications in gene expression and cellular physiological responses (in particular in response to stress) and this review provides an enzymology focused entry point into this exciting field of gene regulation. I recommend that the authors, where possible, provide details and/or relate their mechanistic descriptions of non-canonical capping of RNA to the physiological contexts they were originally described in. I have the following suggestion/queries:

- What role does, if any, non-canonical capping of RNA, has on small non-coding RNA biology? For example, are they stabilized by non-canonical capping or their affinity to RNA binding proteins altered?
- In the context of bacteria, do phages contribute to non-canonical RNA capping. If my memory serves me correctly, there are indirect evidence of this in T4 phage.
- Do non-canonical modification of RNA affect their spatiotemporal regulation?
- All the non-canonical capping modifications are given as enzymatic steps. This is fine; however, I would have preferred to have this as a schematic/cartoon to make this review article more accessible (e.g., like in Fig. 2).
- The text contains some typos and other grammatical errors that need to be rectified. For example: Page 3, line 10; Page 5, line 49/50.

## Decision letter (RSOS-201979.R0)

We hope you are keeping well at this difficult and unusual time. We continue to value your support of the journal in these challenging circumstances. If Royal Society Open Science can assist you at all, please don't hesitate to let us know at the email address below.

Dear Dr Yuzenkova

On behalf of the Editors, we are pleased to inform you that your Manuscript RSOS-201979 "The expanding field of non- canonical RNA capping – new enzymes and mechanisms" has been accepted for publication in Royal Society Open Science subject to minor revision in accordance with the referees' reports. Please find the referees' comments along with any feedback from the Editors below my signature.

We invite you to respond to the comments and revise your manuscript. Below the referees' and Editors' comments (where applicable) we provide additional requirements. Final acceptance of your manuscript is dependent on these requirements being met. We provide guidance below to help you prepare your revision.

Please submit your revised manuscript and required files (see below) no later than 7 days from today's (ie 26-Mar-2021) date. Note: the ScholarOne system will 'lock' if submission of the revision is attempted 7 or more days after the deadline. If you do not think you will be able to meet this deadline please contact the editorial office immediately.

Please note article processing charges apply to papers accepted for publication in Royal Society Open Science (<https://royalsocietypublishing.org/rsos/charges>). Charges will also apply to papers transferred to the journal from other Royal Society Publishing journals, as well as papers submitted as part of our collaboration with the Royal Society of Chemistry (<https://royalsocietypublishing.org/rsos/chemistry>). Fee waivers are available but must be requested when you submit your revision (<https://royalsocietypublishing.org/rsos/waivers>).

Thank you for submitting your manuscript to Royal Society Open Science and we look forward to receiving your revision. If you have any questions at all, please do not hesitate to get in touch.

Best regards,  
Lianne Parkhouse  
Editorial Coordinator  
Royal Society Open Science  
[openscience@royalsociety.org](mailto:openscience@royalsociety.org)

on behalf of Professor Xiaodong Zhang (Associate Editor) and Malcolm White (Subject Editor)  
openscience@royalsociety.org

Associate Editor Comments to Author (Professor Xiaodong Zhang):

The manuscript has been reviewed by two experts who are supportive of the publication and have provided some valuable advice on ways to improve the accessibility and clarify of the manuscript. They have also identified some errors and inconsistencies that need to be addressed.

The authors are advised to take the recommendations fully to correct and improve the manuscript.

Reviewer comments to Author:

**Reviewer: 1**

**Comments to the Author(s)**

This review summarises current state of knowledge on the variety of non-canonical RNA caps discovered to date, the enzymes involved and their mechanisms, both in eukaryotes and in prokaryotes. The authors explain the mechanism of canonical RNA capping and then propose different non-canonical (NC) capping mechanisms. They address NC capping at the initiation of transcription and post-transcription and propose different enzymes that might be involved in these processes. Apart from the widely described NAD<sup>+</sup>/NADH, they also show some of the molecules recently identified as NC including dinucleotide polyphosphates, ADP ribose, and others. Finally, the authors state some of the questions regarding the mechanisms of NC capping and the physiological function of these alternative RNA caps that remain unanswered.

Main comments:

The article can be difficult to read for those who are not familiar with the enzymes and metabolites. Many enzymes are involved: a table can be useful to summarise which enzyme is supposed to be required for a particular non-canonical cap and what is the hypothetical mechanism of the non-canonical capping. There are many abbreviations used, and it might be helpful to also summarise these in the table.

Figures 1 and 3-8 are useful to understand the reactions but could be expanded beyond the simple text presented. Having more graphical figures, with 2D structures of the different interacting molecules and schemas for the protein involved, similar to the ones in Figure 2, might help the reader follow the different mechanisms explained in the Review.

Some positive sense ssRNA viruses have viral protein genome-linked (VPgs) covalently attached to the 5' end of their genome. In caliciviruses, VPgs were confirmed to interact with the cap-binding protein, eIF4E, and to be essential for translation (Goodfellow et al., 2005). Although they are not small molecules but proteins, it might be interesting to mention these viral alternatives as NC 5' RNA caps.

In the second paragraph of page 4 (or page 5 of 17 according to the enumeration at the top of each page). They mention that no NAD-capped RNAs were found in chloroplasts according to Wang et al. (2019), but Zhang et al. (2019) describe a NAD-capped chloroplast rRNA.

Then, they mention an experiment they performed with cyanobacterial RNAPs which could efficiently incorporate NAD<sup>+</sup> into RNA (same page lines 16-20). It would be helpful if they explained a bit more their new findings (what proteins they used? what conditions? etc.) as they do with their experiments with NMNATs NadD and NadR in pages 5-6 (pages 6 of 17 and 7 of 17). (Wang et al., 2019) suggest the absence of NAD-capped RNA in chloroplasts could be due to

low levels of free NAD<sup>+</sup> in this organelle. When they assessed if cyanobacterial RNAPs could incorporate NAD<sup>+</sup> to RNA, did they reproduce in vivo conditions?

Typographical errors:

Abstract line 21 "However, the discovery ... suggests the existence"

P 2 line 10 "synthesize m7G-RNA"

P4 line 36 "is a cofactor"

P6 line 29 "with the hypothesis"

P6 line 59 "in the active "

P7 line 19 "by an unknown"

P 7 line 41 "may be"

P7 line 52 "monomers or "

P 8 line 11 "the existence"

P8 line 24 "countered by a"

P8 line 17 10<sup>-3</sup> is all superscript

P 10 line 18 "prokaryotes"

P 11 line 14 "thanks to the number"

P 11 line 40 "but the biological"

P 11 line 56 "by an unknown"

P 12 line 12 "by a variable"

P 12 line 31 "there exists dedicated"

References

Goodfellow, I. et al. (2005) 'Calicivirus translation initiation requires an interaction between VPg and eIF4E', *EMBO Reports*. European Molecular Biology Organization, 6(10), pp. 968-972. doi: 10.1038/sj.embor.7400510.

Wang, Y. et al. (2019) 'NAD<sup>+</sup>-capped RNAs are widespread in the Arabidopsis transcriptome and can probably be translated', *Proceedings of the National Academy of Sciences of the United States of America*. National Academy of Sciences, 116(24), pp. 12094-12102. doi: 10.1073/pnas.1903682116.

Zhang, H. et al. (2019) 'NAD tagSeq reveals that NAD<sup>+</sup>-capped RNAs are mostly produced from a large number of protein-coding genes in Arabidopsis', *Proceedings of the National Academy of Sciences of the United States of America*. National Academy of Sciences, 116(24), pp. 12072-12077. doi: 10.1073/pnas.1903683116.

**Reviewer: 2**

**Comments to the Author(s)**

RNA can be subjected to diverse non-canonical 5' modifications – called capping. This review presents a comprehensive insight into the different types of non-canonical RNA modifications that exist. Non-canonical RNA capping can have reaching implications in gene expression and cellular physiological responses (in particular in response to stress) and this review provides an enzymology focused entry point into this exciting field of gene regulation. I recommend that the authors, where possible, provide details and/or relate their mechanistic descriptions of non-canonical capping of RNA to the physiological contexts they were originally described in. I have the following suggestion/queries:

- What role does, if any, non-canonical capping of RNA, has on small non-coding RNA biology? For example, are they stabilized by non-canonical capping or their affinity to RNA binding proteins altered?
- In the context of bacteria, do phages contribute to non-canonical RNA capping. If my memory serves me correctly, there are indirect evidence of this in T4 phage.
- Do non-canonical modification of RNA affect their spatiotemporal regulation?

- All the non-canonical capping modifications are given as enzymatic steps. This is fine; however, I would have preferred to have this as a schematic/cartoon to make this review article more accessible (e.g., like in Fig. 2).
- The text contains some typos and other grammatical errors that need to be rectified. For example: Page 3, line 10; Page 5, line 49/50.

#### ===PREPARING YOUR MANUSCRIPT===

Your revised paper should include the changes requested by the referees and Editors of your manuscript. You should provide two versions of this manuscript and both versions must be provided in an editable format:

one version identifying all the changes that have been made (for instance, in coloured highlight, in bold text, or tracked changes);

a 'clean' version of the new manuscript that incorporates the changes made, but does not highlight them. This version will be used for typesetting.

Please ensure that any equations included in the paper are editable text and not embedded images.

Please ensure that you include an acknowledgements' section before your reference list/bibliography. This should acknowledge anyone who assisted with your work, but does not qualify as an author per the guidelines at <https://royalsociety.org/journals/ethics-policies/openness/>.

While not essential, it will speed up the preparation of your manuscript proof if you format your references/bibliography in Vancouver style (please see <https://royalsociety.org/journals/authors/author-guidelines/#formatting>). You should include DOIs for as many of the references as possible.

If you have been asked to revise the written English in your submission as a condition of publication, you must do so, and you are expected to provide evidence that you have received language editing support. The journal would prefer that you use a professional language editing service and provide a certificate of editing, but a signed letter from a colleague who is a native speaker of English is acceptable. Note the journal has arranged a number of discounts for authors using professional language editing services (<https://royalsociety.org/journals/authors/benefits/language-editing/>).

#### ===PREPARING YOUR REVISION IN SCHOLARONE===

To revise your manuscript, log into <https://mc.manuscriptcentral.com/rsos> and enter your Author Centre - this may be accessed by clicking on "Author" in the dark toolbar at the top of the page (just below the journal name). You will find your manuscript listed under "Manuscripts with Decisions". Under "Actions", click on "Create a Revision".

Attach your point-by-point response to referees and Editors at Step 1 'View and respond to decision letter'. This document should be uploaded in an editable file type (.doc or .docx are preferred). This is essential.

Please ensure that you include a summary of your paper at Step 2 'Type, Title, & Abstract'. This should be no more than 100 words to explain to a non-scientific audience the key findings of your research. This will be included in a weekly highlights email circulated by the Royal Society press office to national UK, international, and scientific news outlets to promote your work.

At Step 3 'File upload' you should include the following files:

-- Your revised manuscript in editable file format (.doc, .docx, or .tex preferred). You should upload two versions:

- 1) One version identifying all the changes that have been made (for instance, in coloured highlight, in bold text, or tracked changes);
- 2) A 'clean' version of the new manuscript that incorporates the changes made, but does not highlight them.

-- An individual file of each figure (EPS or print-quality PDF preferred [either format should be produced directly from original creation package], or original software format).

-- An editable file of each table (.doc, .docx, .xls, .xlsx, or .csv).

-- An editable file of all figure and table captions.

Note: you may upload the figure, table, and caption files in a single Zip folder.

-- Any electronic supplementary material (ESM).

-- If you are requesting a discretionary waiver for the article processing charge, the waiver form must be included at this step.

-- If you are providing image files for potential cover images, please upload these at this step, and inform the editorial office you have done so. You must hold the copyright to any image provided.

-- A copy of your point-by-point response to referees and Editors. This will expedite the preparation of your proof.

At Step 6 'Details & comments', you should review and respond to the queries on the electronic submission form. In particular, we would ask that you do the following:

-- Ensure that your data access statement meets the requirements at

<https://royalsociety.org/journals/authors/author-guidelines/#data>. You should ensure that you cite the dataset in your reference list. If you have deposited data etc in the Dryad repository, please only include the 'For publication' link at this stage. You should remove the 'For review' link.

-- If you are requesting an article processing charge waiver, you must select the relevant waiver option (if requesting a discretionary waiver, the form should have been uploaded at Step 3 'File upload' above).

-- If you have uploaded ESM files, please ensure you follow the guidance at

<https://royalsociety.org/journals/authors/author-guidelines/#supplementary-material> to include a suitable title and informative caption. An example of appropriate titling and captioning may be found at [https://figshare.com/articles/Table\\_S2\\_from\\_Is\\_there\\_a\\_trade-off\\_between\\_peak\\_performance\\_and\\_performance\\_breadth\\_across\\_temperatures\\_for\\_aerobic\\_scops\\_in\\_teleost\\_fishes\\_/3843624](https://figshare.com/articles/Table_S2_from_Is_there_a_trade-off_between_peak_performance_and_performance_breadth_across_temperatures_for_aerobic_scops_in_teleost_fishes_/3843624).

At Step 7 'Review & submit', you must view the PDF proof of the manuscript before you will be able to submit the revision. Note: if any parts of the electronic submission form have not been completed, these will be noted by red message boxes.

## Author's Response to Decision Letter for (RSOS-201979.R0)

See Appendix A.

## Decision letter (RSOS-201979.R1)

We hope you are keeping well at this difficult and unusual time. We continue to value your support of the journal in these challenging circumstances. If Royal Society Open Science can assist you at all, please don't hesitate to let us know at the email address below.



Dear Dr yuzenkova,

It is a pleasure to accept your manuscript entitled "The expanding field of non- canonical RNA capping – new enzymes and mechanisms" in its current form for publication in Royal Society Open Science.

You can expect to receive a proof of your article in the near future. Please contact the editorial office ([openscience@royalsociety.org](mailto:openscience@royalsociety.org)) and the production office ([openscience\\_proofs@royalsociety.org](mailto:openscience_proofs@royalsociety.org)) to let us know if you are likely to be away from e-mail contact -- if you are going to be away, please nominate a co-author (if available) to manage the proofing process, and ensure they are copied into your email to the journal.

Due to rapid publication and an extremely tight schedule, if comments are not received, your paper may experience a delay in publication.

Please see the Royal Society Publishing guidance on how you may share your accepted author manuscript at <https://royalsociety.org/journals/ethics-policies/media-embargo/>. After publication, some additional ways to effectively promote your article can also be found here <https://royalsociety.org/blog/2020/07/promoting-your-latest-paper-and-tracking-your-results/>.

Thank you for your fine contribution. On behalf of the Editors of Royal Society Open Science, we look forward to your continued contributions to the Journal.

Kind regards,  
Royal Society Open Science Editorial Office  
Royal Society Open Science  
[openscience@royalsociety.org](mailto:openscience@royalsociety.org)

on behalf of Prof Malcolm White (Subject Editor)  
[openscience@royalsociety.org](mailto:openscience@royalsociety.org)

Follow Royal Society Publishing on Twitter: @RSocPublishing  
Follow Royal Society Publishing on Facebook:  
<https://www.facebook.com/RoyalSocietyPublishing.FanPage/>  
Read Royal Society Publishing's blog:  
<https://royalsociety.org/blog/blogsearchpage/?category=Publishing>

## Appendix A

We thank reviewers for their time and effort to read and provide comments on our admittedly not-easiest-to-read manuscript. We believe that incorporating their comments allowed us to improve our paper and make it more accessible for a general reader. Below are our point replies to reviewers' comments.

### Reviewer: 1

#### Comments to the Author(s)

This review summarises current state of knowledge on the variety of non-canonical RNA caps discovered to date, the enzymes involved and their mechanisms, both in eukaryotes and in prokaryotes. The authors explain the mechanism of canonical RNA capping and then propose different non-canonical (NC) capping mechanisms. They address NC capping at the initiation of transcription and post-transcription and propose different enzymes that might be involved in these processes. Apart from the widely described NAD<sup>+</sup>/NADH, they also show some of the molecules recently identified as NC including dinucleotide polyphosphates, ADP ribose, and others. Finally, the authors state some of the questions regarding the mechanisms of NC capping and the physiological function of these alternative RNA caps that remain unanswered.

Main comments:

The article can be difficult to read for those who are not familiar with the enzymes and metabolites. Many enzymes are involved: a table can be useful to summarise which enzyme is supposed to be required for a particular non-canonical cap and what is the hypothetical mechanism of the non-canonical capping.

*We summarised the known and potential capping enzymes and products of their enzymatic functions in the Table 2. Mechanism of action is described in the main text and is not included in this table due to being too extensive.*

There are many abbreviations used, and it might be helpful to also summarise these in the table.

*We summarised abbreviations in a new Table 1.*

Figures 1 and 3-8 are useful to understand the reactions but could be expanded beyond the simple text presented. Having more graphical figures, with 2D structures of the different interacting molecules and schemas for the protein involved, similar to the ones in Figure 2, might help the reader follow the different mechanisms explained in the Review.

*We included new 2D cartoon figures of all presented mechanisms in the text.*

Some positive sense ssRNA viruses have viral protein genome-linked (VPgs) covalently attached to the 5' end of their genome. In caliciviruses, VPgs were confirmed to interact with the cap-binding protein, eIF4E, and to be essential for translation (Goodfellow et al.,

2005). Although they are not small molecules but proteins, it might be interesting to mention these viral alternatives as NC 5' RNA caps.

*We included new paragraph about VPgs (page 22)*

In the second paragraph of page 4 (or page 5 of 17 according to the enumeration at the top of each page). They mention that no NAD-capped RNAs were found in chloroplasts according to Wang et al. (2019), but Zhang et al. (2019) describe a NAD-capped chloroplast rRNA.

*We corrected the information about chloroplast RNAP capping in the text (page 6)*

Then, they mention an experiment they performed with cyanobacterial RNAPs which could efficiently incorporate NAD<sup>+</sup> into RNA (same page lines 16-20). It would be helpful if they explained a bit more their new findings (what proteins they used? what conditions? etc.) as they do with their experiments with NMNATs NadD and NadR in pages 5-6 (pages 6 of 17 and 7 of 17). (Wang et al., 2019) suggest the absence of NAD-capped RNA in chloroplasts could be due to low levels of free NAD<sup>+</sup> in this organelle. When they assessed if cyanobacterial RNAPs could incorporate NAD<sup>+</sup> to RNA, did they reproduce in vivo conditions?

*We include primary data on transcription by various RNAPs including cyanobacterial one. Reported levels of NAD<sup>+</sup>/NADH vary depending on conditions, but maximum concentration in chloroplasts are not massively different from maximum concentration in cytosol. According to recent review (Gakiere et al., 2018), total for (NAD<sup>+</sup>+NADH) are 0.39 mM for chloroplast and 0.65 mM for cytosol. These numbers are in the range of Km for NAD<sup>+</sup>/NADH incorporation in a transcript (around 0.4 mM), admittedly by E. coli enzyme.*

*We performed our reactions using 0.5 mM NAD<sup>+</sup>, thus we reproduced most favourable in vivo conditions. The main aim of the experiment was to show that initiation of transcription with cofactors is a ubiquitous feature among prokaryotic enzymes, and that cyanobacterial RNAP (and quite possibly chloroplast one by proxy) does not have any structural domains which precludes incorporation of cofactors.*

*We clarified other reaction conditions we used for cyanobacterial transcription.*

Typographical errors:

Abstract line 21 "However, the discovery ... suggests the existence"

P 2 line 10 "synthesize m7G-RNA"

P4 line 36 "is a cofactor"

P6 line 29 "with the hypothesis"

P6 line 59 "in the active "

P7 line 19 "by an unknown"

P 7 line 41 "may be"

P7 line 52 "monomers or "

P 8 line 11 "the existence"  
P8 line 24 "countered by a"  
P8 line 17 10<sup>-3</sup> is all superscript  
P 10 line 18 "prokaryotes"  
P 11 line 14 "thanks to the number"  
P 11 line 40 "but the biological"  
P 11 line 56 "by an unknown"  
P 12 line 12 "by a variable"  
P 12 line 31 "there exists dedicated"

*Typographical errors were corrected*

## References

Goodfellow, I. et al. (2005) 'Calicivirus translation initiation requires an interaction between VPg and eIF4E', *EMBO Reports*. European Molecular Biology Organization, 6(10), pp. 968–972. doi: 10.1038/sj.embor.7400510.

Wang, Y. et al. (2019) 'NAD<sup>+</sup>-capped RNAs are widespread in the Arabidopsis transcriptome and can probably be translated', *Proceedings of the National Academy of Sciences of the United States of America*. National Academy of Sciences, 116(24), pp. 12094–12102. doi: 10.1073/pnas.1903682116.

Zhang, H. et al. (2019) 'NAD tagSeq reveals that NAD<sup>+</sup>-capped RNAs are mostly produced from a large number of protein-coding genes in Arabidopsis', *Proceedings of the National Academy of Sciences of the United States of America*. National Academy of Sciences, 116(24), pp. 12072–12077. doi: 10.1073/pnas.1903683116.

## **Reviewer: 2**

### **Comments to the Author(s)**

RNA can be subjected to diverse non-canonical 5' modifications – called capping. This review presents a comprehensive insight into the different types of non-canonical RNA modifications that exist. Non-canonical RNA capping can have reaching implications in gene expression and cellular physiological responses (in particular in response to stress) and this review provides an enzymology focused entry point into this exciting field of gene regulation. I recommend that the authors, where possible, provide details and/or relate their mechanistic descriptions of non-canonical capping of RNA to the physiological contexts they were originally described in. I have the following suggestion/queries:

- What role does, if any, non-canonical capping of RNA, has on small non-coding RNA biology? For example, are they stabilized by non-canonical capping or their affinity to RNA binding proteins altered?

*The data on stability are conflicting – in E. coli it was shown that capping increased stability of one specific RNA; in eukaryotes it was researched more extensively, and current view is that capping targets RNA for degradation.*

*We summarise briefly the emerging physiological role of NC caps. But this topic is beyond the scope of this review and was recently reviewed e.g. in*

*Vasilyev et al. (2019) Non-canonical features and modifications on the 5'- end of bacterial sRNAs and mRNAs Wiley Interdiscip Rev RNA 10 (2) e1509*

*Julius, C., and Yuzenkova, Y. (2019) Noncanonical RNA-capping: Discovery, mechanism, and physiological role debate. Wiley Interdiscip Rev RNA 10 (2) e1512.*

- In the context of bacteria, do phages contribute to non-canonical RNA capping. If my memory serves me correctly, there are indirect evidence of this in T4 phage.

*We are not aware of any published data on this; T4 does not have its own RNAP, and relies on E. coli host RNAP to transcribe its genes. Since E. coli RNAP is able to cap transcripts with cofactors, it follows that there is high probability of T4 transcripts being capped.*

*NAD<sup>+</sup> plays role in a developmental programme of T4 phage in a distinct way – T4 codes for three mono-ADP-ribosyltransferases which transfer ADP-ribose from NAD<sup>+</sup> to a target. One of them, Alt is present in a phage particle. These enzymes modify a number of E. coli proteins, including RNAP, EF-TU, toxin-antitoxin, etc. Potentially these enzymes can modify nucleic acids.*

*Single-subunit RNAP of T7 phage efficiently incorporates NAD<sup>+</sup> into the transcript in vitro on +1A promoters, yet T7 strongly prefers +1G promoters in vivo (there are class II phage promoters where to some extent initiation can start with ATP or NAD). Altogether, there is a probability to find capped T7 RNA species, but they will be low abundant.*

- Do non-canonical modification of RNA affect their spatiotemporal regulation?

*This is very exciting proposition, which we would like to test, as so many proteins bind NAD as a cofactor and therefore would drag capped RNA to their specific subcellular location, but currently not much is known about it.*

- All the non-canonical capping modifications are given as enzymatic steps. This is fine; however, I would have preferred to have this as a schematic/cartoon to make this review article more accessible (e.g., like in Fig. 2).

*We included new 2D cartoon figures of all presented mechanisms in the text (Fig. 1 and 3-9).*

- The text contains some typos and other grammatical errors that need to be rectified. For example: Page 3, line 10; Page 5, line 49/50.

*Typographical errors were corrected.*
